# Supplementary material
Source: PubMed Central journal article supplement (PMC2845424)
Supplement: fj.08-126821_1.pdf [file fj.08-126821_1.pdf]

## Supplemental Information

### Characterization of Integrin Engagement during Defined Human Embryonic Stem Cell Culture

Ying Meng,<sup>1†</sup> Shawdee Eshghi,<sup>2†</sup> Ying J. Li,<sup>1</sup> Ray Schmidt,<sup>1</sup> David V. Schaffer,<sup>2,3</sup> and Kevin E. Healy<sup>1,4\*</sup>

<sup>1</sup>Department of Bioengineering, University of California at Berkeley, Berkeley, California, United States

<sup>2</sup>Department of Chemical Engineering, University of California at Berkeley, Berkeley, CA, United States

<sup>3</sup>The Helen Wills Neuroscience Institute, University of California at Berkeley, Berkeley, CA, United States

<sup>4</sup>Department of Materials Science and Engineering, University of California at Berkeley, CA, United States

† These authors contributed equally to the work presented.

**Key Words:** integrin · human embryonic stem cells · extracellular matrix · Matrigel · peptide

\*Correspondence:

Kevin E. Healy, Department of Materials Science and Engineering, 370 Hearst Memorial Mining Bldg.  
#1760, Berkeley, CA 94720-1760

T: 510 643-3559

F: 510 643-5792

[kehealy@berkeley.edu](mailto:kehealy@berkeley.edu)

<http://biomaterials.berkeley.edu/>

**Table S1. Oligonucleotide sequences of primers used for RT – PCR.**

| Gene                    | Forward Primer                           | Reverse Primer                       | Length<br>(base pairs) |
|-------------------------|------------------------------------------|--------------------------------------|------------------------|
| Integrin $\alpha_1$     | 5'-TCCAGTGAGATTTTCAGAGACC -3'            | 5'-GTGATTTCCTGTGTTTTTCGTCTG-3'       | 117                    |
| Integrin $\alpha_2$     | 5'-AACTCTTTGGATTTGCGTGTG - 3'            | 5'-TGGCAGTCTCAGAATAGGCTT-3'          | 82                     |
| Integrin $\alpha_{IIb}$ | 5'-AGCTGCGAGGGAACCTCTT- 3'               | 5'-GGTGTGCTCCACTTTGGGT-3'            | 104                    |
| Integrin $\alpha_4$     | 5'-ACTGTGAAGGCACGAGTGTG - 3'             | 5'-TGCTGGTTCGGAGGAATAG-3'            | 103                    |
| Integrin $\alpha_5$     | 5'-AGAGAGACAATCAGTGGTTGG - 3'            | 5'-TCAGTTCTGTTCGTAAATCAGG-3'         | 168                    |
| Integrin $\alpha_6$     | 5'-TGCCTCCCTCACCATCTTC - 3'              | 5'-TGCTTCTGCCAGTCCAGC-3'             | 171                    |
| Integrin $\alpha_8$     | 5'-TGATCGAAATTCCTACCCTGATG - 3'          | 5'-TAATCACAGGCCGGGATCTG-3'           | 81                     |
| Integrin $\alpha_v$     | 5'-GGGCAGCTACTTCGGCTAC - 3'              | 5'-GGCTCCCCCTTCCACGATA-3'            | 110                    |
| Integrin $\beta_1$      | 5'-CAAAGGAACAGCAGAGAAGC - 3'             | 5'-ATTGAGTAAGACAGGTCCATAAGG-3'       | 168                    |
| Integrin $\beta_3$      | 5'-GTGGTAGAAGAGCCAGAGTGTCC -3'           | 5'-CGTGGATGGTGATGAGGAGTTTC-3'        | 126                    |
| Integrin $\beta_4$      | 5'-GTGGTAGAACCAGAGTGTCC-3'               | 5'-CGTGGATGGTGATGAGGAGTTTC-3'        | 521                    |
| Integrin $\beta_5$      | 5'-AAGTCCACCCATTGAAGA-3'                 | 5'-CCACAGCCATTTTTGACAAGG-3'          | 135                    |
| Integrin $\beta_6$      | 5'-TAACCAGCAACTTTAGACTGGGC-3'            | 5'-TCAGCATTTGTAATGCA-3'              | 181                    |
| Integrin $\beta_8$      | 5'-TTTGTCTGCCTGCAAAACGAC-3'              | 5'-GCCCAGTCCAAGAACAAGTGA-3'          | 84                     |
| Oct3/4                  | 5'-CTGGGTTGATCCTCGGACCT-3'               | 5'-CACAGAACTCATACGGCGGG-3'           | 128                    |
| Nanog                   | 5'-AAAGAATCTTCACCTATGCC-3'               | 5'-GAAGGAAGAGGAGAGACAGT-3'           | 110                    |
| Pax6                    | 5'-GTCCATCTTTGCTTGGGAAA-3'               | 5'-TAGCCAGGTTGCGAAGAACT-3'           | 814                    |
| MAP2                    | 5'-CAGGTGGCGGACGTGTGAAAATTGAGA<br>GTG-3' | 5'-CACGCTGGATCTGCCTGGGGACTGT<br>G-3' | 221                    |
| Msx1                    | 5'-CGAGAGGACCCCGTGGATGCAGAG-3'           | 5'-GGCGGCCATCTTCAGCTTCTCCAG-3'       | 307                    |
| GAPDH                   | 5'-GTGGACCTGACCTGCCGTCT-3'               | 5'-GGAGGAGTGGGTGTCGCTGT-3'           | 153                    |

We gratefully acknowledge the primer sequences for pluripotency and germ layers provided by Shinya Yamanaka, Kyoto University.

**Table S2 Integrin antibodies used: specific clones, host species, and manufacturer.**

| Antibody Target                | Clone    | Host / Isotype      | Source            |
|--------------------------------|----------|---------------------|-------------------|
| Integrin $\alpha_1$            | FB12     | mcl mouse IgG1      | Chem: MAB1973z-20 |
| Integrin $\alpha_2$            | P1E6     | mcl mouse IgG1      | Chem: MAB1950z-20 |
| Integrin $\alpha_3$ (CD49c)    | ASC-1    | mcl mouse IgG1      | Chem: MAB2056-20  |
|                                | P1B5     | mcl mouse IgG1      | Chem: MAB1952Z    |
| Integrin $\alpha_4$            | P4C2     | mcl mouse IgG3      | Chem: MAB1955     |
| Integrin $\alpha_5$            | P1D6     | mcl mouse IgG3      | Chem: MAB1956Z    |
| Integrin $\alpha_6$ (CD49f)    | NKI-GoH3 | mcl rat IgG2a       | Chem: MAB1378-20  |
|                                |          | pcl rabbit          | Chem: MAB1930     |
| Integrin $\beta_1$             | P4G11    | mouse IgG1          | Chem: MAB1951z-20 |
| Integrin $\beta_3$             |          | pcl rabbit          | Chem: AB1932      |
| Integrin $\beta_4$             | ASC-3    | mouse IgG1          | Chem: MAB2058-20  |
| Integrin $\alpha_2\beta_1$     | BHA2.1   |                     | Chem: MAB1998Z    |
| Integrin $\alpha_v\beta_3$     | LM609    | mouse IgG1          | Chem: MAB1976z    |
| Isotype                        |          | Purified mouse IgG1 | Caltag: MG100     |
| Isotype                        |          | Normal rabbit IgG   | Upstate: 12-370   |
| Isotype                        |          | purified rat IgG2a  | Caltag: R2A00     |
| $\alpha$ -mouse IgG Alexa 488  |          | goat                | Mole Prob: A11029 |
| $\alpha$ -rabbit IgG Alexa 488 |          | goat                | Mole Prob: A11034 |
| $\alpha$ -rat IgG Alexa 488    |          | donkey              | Mole Prob: A21208 |

mcl = monoclonal; pcl = polyclonal; Chem = Chemicon; Mole Prob = Molecular Probes; Caltag = Caltag Lab; Upstate = Upstate (Millipore).

Relevant information from the manufacturers' factsheets.

The FB12 antibody clone, which reacts with the I domain (Val<sub>151</sub>-Ala<sub>364</sub>) of the human  $\alpha_1$  integrin (CD49a), was used for the  $\alpha_1$  integrin antibody. It has been found to inhibit the binding of activated human lymphocyte to laminin, collagen IV, and fibronectin.

The P1E6 clone was used for the  $\alpha_2$  integrin antibody. This antibody has been found to inhibit adhesion of fibroblasts, epithelial cells, endothelial cells, and non-activated platelets on collagens I, III, IV, VI, and laminin.

The ASC-1 clone was used for the  $\alpha_3$  (CD49c) integrin antibody, and this antibody has been found to inhibit cell attachment to laminin, but not fibronectin or collagen IV.

The NKI-GoH3 antibody was used for the  $\alpha_6$  integrin antibody, against the CD49f antigen. This clone has been found to react with a variety of cell types, including platelets, T lymphocytes, epithelial cells, peripheral nerves, and endothelial cells.

The MAB1930 polyclonal antibody was used for the  $\alpha_v$  integrin subunit, and it recognizes the intracellular cytoplasmic domain of the protein. The antibody was found to not cross react to  $\alpha_1$ ,  $\alpha_2$ ,  $\alpha_3$ ,  $\alpha_4$ , or  $\alpha_6$  integrins.

The P4G11 antibody clone was used for the  $\beta_1$  integrin antibody, and its epitope recognition is  $\text{Ca}^{2+}$  dependent and has been found to be activating for ECM binding.

The MAB1932 polyclonal antibody was used for the  $\beta_3$  integrin subunit, and importantly does not cross react with  $\beta_1$  or  $\beta_2$  integrins.

The ASC-3 clone was used for the  $\beta_4$  integrin antibody. This antibody was found to inhibit adhesion of some cell types to laminin, but not to collagen IV or fibronectin. The LM609 monoclonal antibody was used for the  $\alpha_v\beta_3$  integrin antibody, and it is found to be reactive for the vitronectin receptor complex and to inhibit adhesion to vitronectin coated surfaces.

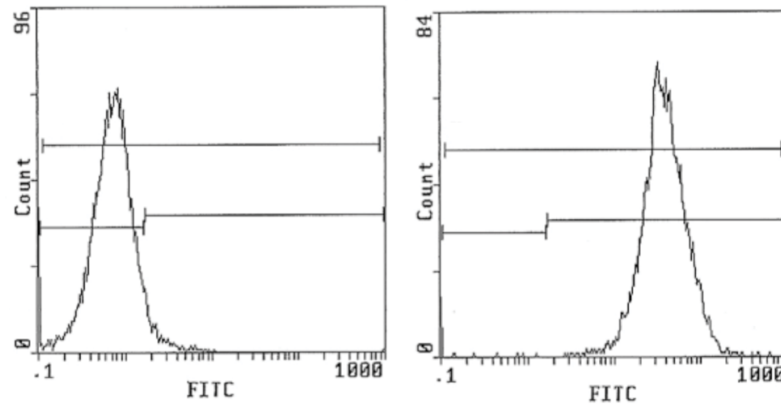

**Figure S1** Histograms of the mouse IgG1 isotype control (left) and  $\beta 1$  integrin (right), indicating integrin expression above the background by >90% of the cells.

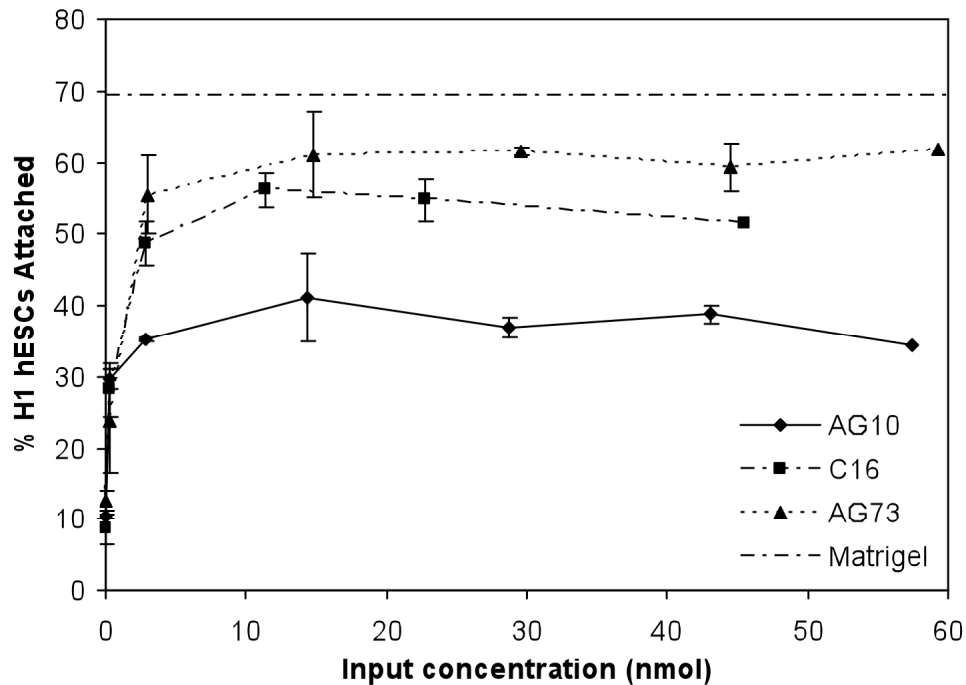

**Figure S2** Percent attachment of H1 cells to peptide-coated substrata as a function of the amount of peptide added. Three peptides, AG10, C16, and AG73 known to engage  $\alpha_6\beta_1$  and  $\alpha_v\beta_3$  integrins and Syndecan-1, respectively, were adsorbed at various concentrations and shown to support hESC adhesion. As a comparison, the dashed line represents the percent attachment observed on Matrigel<sup>TM</sup>-coated substrata. Cell adhesion increased with input concentration of peptide, until a threshold value of ~10 nmol/well was reached, above which no further increase of cell attachment was observed. Values of 0 nmol/well input concentration represent substrates blocked with BSA.

**Table S3** Human ES colony properties on individual peptides (AG10, C16 & AG73) and binary and ternary peptide combinations. A nonparameteric method was used to record the percentage of the culture well covered by the colonies and number of colonies. The number of Oct4(+) cells within areas of the culture surface containing colonies was counted as well. These data and similar analyses were used to select the AG10:C16:AG73 (60:16:24) surface for more thorough analyses.

| Peptide Coating             | Percentage Culture Area Covered by Colonies | Number of Colonies | Number of Oct4(+) Colonies in 5 Randomly Selected Colony Areas |
|-----------------------------|---------------------------------------------|--------------------|----------------------------------------------------------------|
| AG10                        | 50-75                                       | 25-50              | 9                                                              |
| C16                         | < 25                                        | < 25               | 16                                                             |
| AG73                        | 50-75                                       | < 25               | 14                                                             |
| AG10:C16:AG73<br>(60:16:24) | 50-75                                       | 25-50              | 19                                                             |
| AG10:C16:AG73<br>(20:32:48) | < 25                                        | < 25               | 21                                                             |
| C16:AG73<br>(40:60)         | < 25                                        | < 25               | 20                                                             |

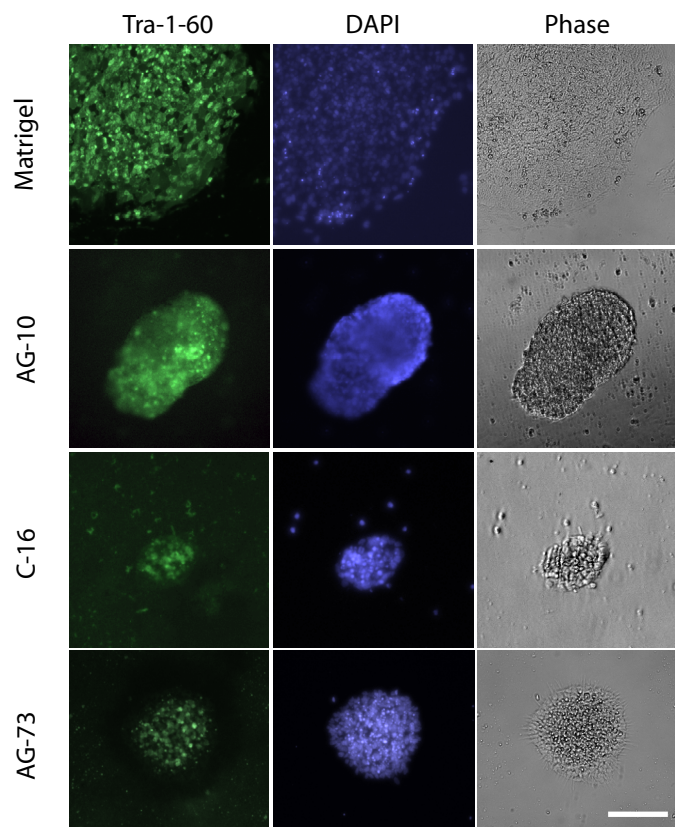

**Figure S3** H1 hES cells were cultured on peptide-coated substrata for 7 days and Tra-1-60 marker expression was assessed by immunofluorescence. Scale bar: 500  $\mu$ m.
